# Supplementary material for: Mediation effect of stroke recurrence in the association between post-stroke lactate dehydrogenase and functional disability
Source: Frontiers journal article supplement (doi:10.3389/fnagi.2024.1450863), 2024-08-30
Supplement: Data_Sheet_1.PDF [file Data_Sheet_1.PDF]

## Supplementary Materials:

Table S1: The baseline characteristics comparison between original data and imputed data.

| Variables                     | Original data<br>(n = 1235) | Imputed data<br>(n = 1293) | Pvalue |
|-------------------------------|-----------------------------|----------------------------|--------|
| Demographic                   |                             |                            |        |
| Age                           | 64 (58, 71)                 | 64 (58, 71)                | 1.00   |
| Gender, n (%)                 |                             |                            | 1.00   |
| Male                          | 3632 (71)                   | 3632 (71)                  |        |
| Female                        | 1497 (29)                   | 1497 (29)                  |        |
| Smoking, n (%)                | 2232 (44)                   | 2234 (44)                  | 0.99   |
| Drinking, n(%)                | 1503 (29)                   | 1503 (29)                  | 1.00   |
| NIHSS scores at admission     | 3.0(2.0-5.0)                | 3.0(2.0-5.0)               | 1.00   |
| ADL scores at admission       | 80(60-95)                   | 80(60-95)                  | 1.00   |
| Blood pressure,<br>mmHg       |                             |                            |        |
| SBP                           | 148 (138, 160)              | 148 (138, 160)             | 1.00   |
| DBP                           | 85 (80, 94)                 | 85 (80, 94)                | 1.00   |
| Medical history               |                             |                            |        |
| Heart failure, n (%)          | 95 (2)                      | 98 (2)                     | 0.935  |
| Previous heart disease, n (%) | 1095 (21)                   | 1095 (21)                  | 1.00   |
| Diabetes mellitus, n (%)      | 1616 (32)                   | 1616 (32)                  | 1.00   |
| Hypertension, n (%)           | 3458 (67)                   | 3458 (67)                  | 1.00   |
| Atrial Fibrillation, n (%)    | 340 (7)                     | 340 (7)                    | 1.00   |
| Hyperlipidemia, n (%)         | 720 (14)                    | 720 (14)                   | 1.00   |
| Prior stroke, n (%)           | 1823 (36)                   | 1824 (36)                  | 1.00   |
| Toast type, n (%)             |                             |                            | 1.00   |
| LAA                           | 3995 (78)                   | 3995 (78)                  |        |
| CE                            | 304 (6)                     | 304 (6)                    |        |
| SAO                           | 695 (14)                    | 695 (14)                   |        |
| SOE                           | 135 (3)                     | 135 (3)                    |        |

Abbreviations: NIHSS, National Institute of Health Stroke Scale; mRS, modified Rankin scale; ADL, activities of daily living; LDH, lactate dehydrogenase; LAA, large-artery atherosclerosis; CE: cardio-embolism; SAO: small-vessel occlusion; SOE: stroke of other determined etiology.

Table S2: The baseline characteristics comparison between excluded patients and included patients.

| Variables                 | Excluded patients<br>(n = 2909) | Included patients<br>(n = 5129) | Pvalue |
|---------------------------|---------------------------------|---------------------------------|--------|
| Demographic               |                                 |                                 |        |
| Age                       | 66 (59, 73)                     | 65 (58, 72)                     | <0.001 |
| Gender, n (%)             |                                 |                                 | 0.125  |
| Male                      | 2017 (69)                       | 3641 (71)                       |        |
| Female                    | 892 (31)                        | 1488 (29)                       |        |
| Smoking, n (%)            | 1415 (49)                       | 2242 (44)                       | <0.001 |
| Drinking, n(%)            | 849 (29)                        | 1499 (29)                       | 0.99   |
| NIHSS scores at admission | 3.0(1.0-6.0)                    | 3.0(2.0-5.0)                    | 0.25   |
| ADL scores at admission   | 80(60-95)                       | 80(60-100)                      | 0.06   |
| Medical history           |                                 |                                 |        |
| Heart failure, n (%)      | 86 (3)                          | 101 (2)                         | 0.006  |

|                               |           |           |        |
|-------------------------------|-----------|-----------|--------|
| Previous heart disease, n (%) | 674 (23)  | 1089 (21) | 0.047  |
| Diabetes mellitus, n (%)      | 918 (32)  | 1620 (32) | 0.99   |
| Hypertension, n (%)           | 1958 (67) | 3436 (67) | 0.79   |
| Atrial Fibrillation, n (%)    | 212 (7)   | 334 (7)   | 0.2    |
| Hyperlipidemia, n (%)         | 402 (14)  | 731 (14)  | 0.615  |
| Prior stroke, n (%)           | 1045 (36) | 1816 (35) | 0.66   |
| Toast type, n (%)             |           |           | <0.001 |
| LAA                           | 2249 (77) | 3992 (78) |        |
| CE                            | 104 (4)   | 309 (6)   |        |
| SAO                           | 463 (16)  | 693 (14)  |        |
| SOE                           | 93 (3)    | 135 (3)   |        |

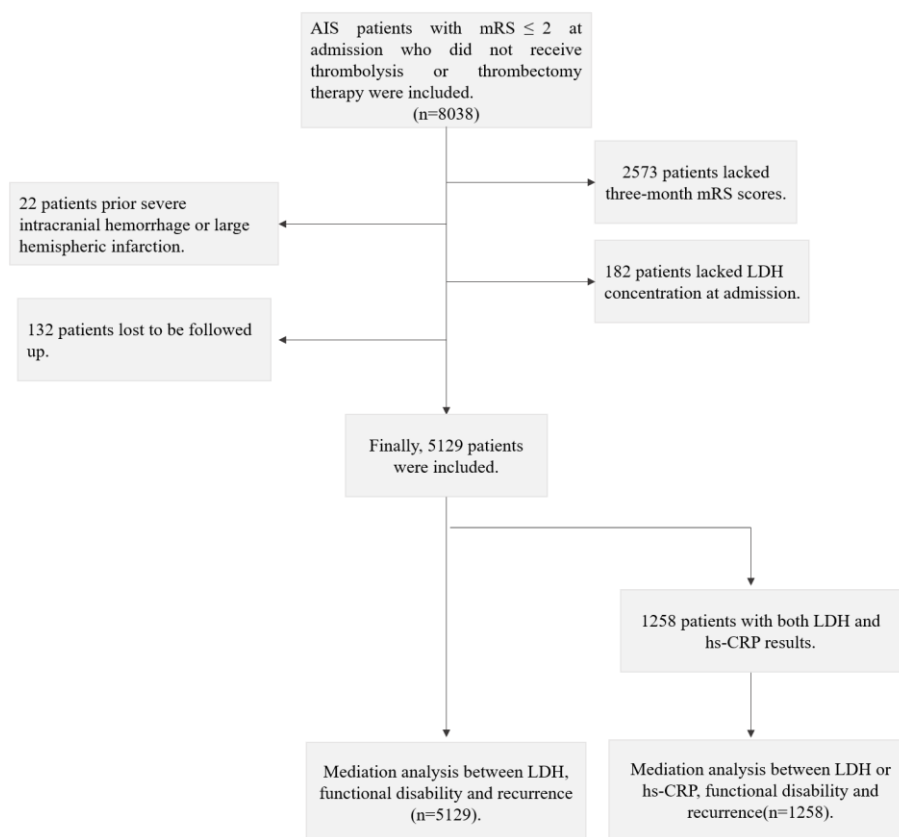

Figure S1: Flowchart for this analysis.

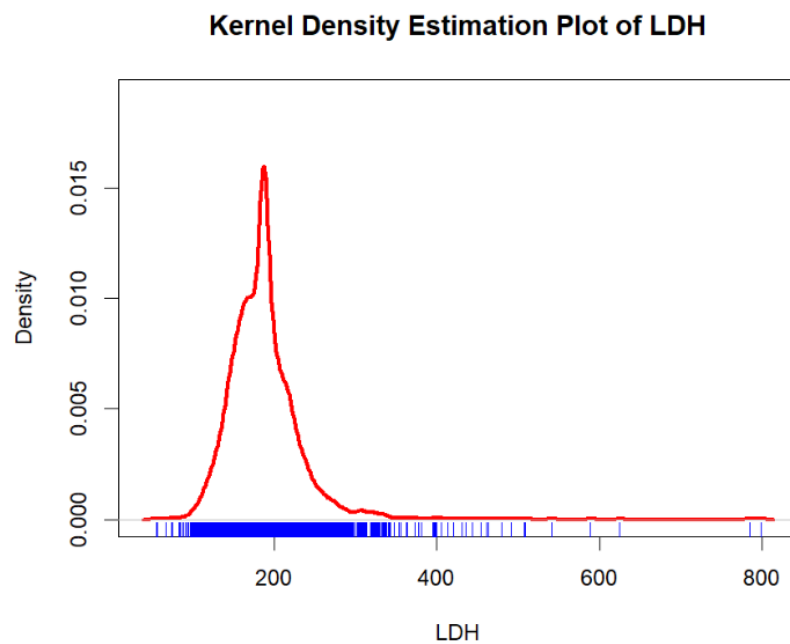

Figure S2: Detailed distribution of LDH in kernel density estimation plot.

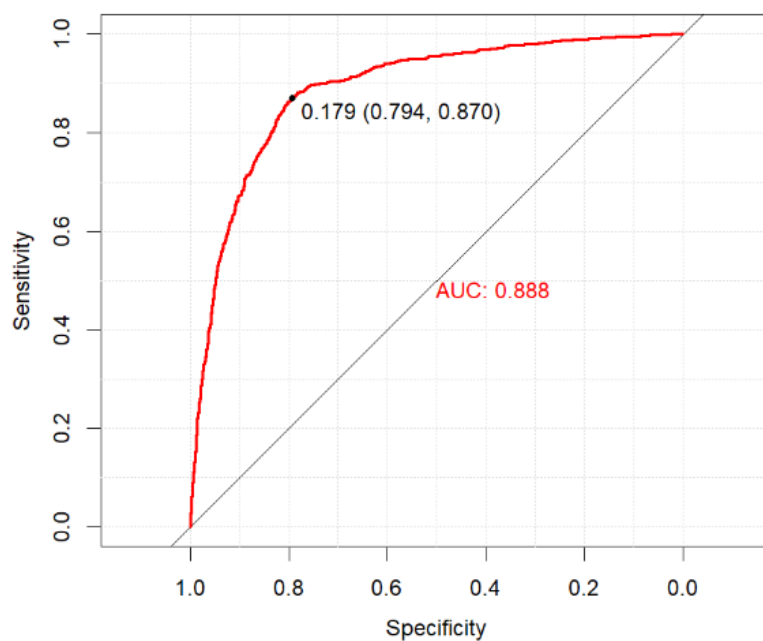

Figure S3: Receiver operating characteristic (ROC) curves of LDH with several covariates (age, gender, smoking status, diabetes mellitus, hypertension, hyperlipidemia and toast type) predicting three-month adverse outcome. The nomogram had good discriminative power with an area under the ROC curve(AUC) of 0.888 (95% CI, 0.830-0.905).
